# Supplementary material for: Exploring variations of hexabromocyclododecane concentrations in riverine sediments along the River Medway, UK
Source: Royal Society of Chemistry journal article supplement (doi:10.1039/d1em00102g), 2021-01-01
Supplement: d1em00102g1.pdf [file d1em00102g1.pdf]

Supporting Information for:

Exploring variations of Hexabromocyclododecane concentrations in riverine sediments along the River Medway, UK

Benjamin Harris<sup>1</sup>, Mohamed Abou-Elwafa Abdallah<sup>1\*</sup>

School of Geography, Earth and Environmental Sciences,

University of Birmingham

Birmingham B15 2TT,

United Kingdom

\* Corresponding author

[M.abdallah@bham.ac.uk](mailto:M.abdallah@bham.ac.uk)

**Table S1: Concentrations of HBCDD in the studied sediment samples from the river Medway.**

| Site       | ng/g dw         |                |                 |                | Organic Carbon | ng/g OC         |                |                 |                |
|------------|-----------------|----------------|-----------------|----------------|----------------|-----------------|----------------|-----------------|----------------|
|            | $\alpha$ -HBCDD | $\beta$ -HBCDD | $\gamma$ -HBCDD | $\Sigma$ HBCDD |                | $\alpha$ -HBCDD | $\beta$ -HBCDD | $\gamma$ -HBCDD | $\Sigma$ HBCDD |
| <b>S1</b>  | 0.87            | 0.27           | 2.22            | 3.36           | 0.0121         | 72              | 22             | 184             | 278            |
| <b>S2</b>  | 0.88            | 0.28           | 1.67            | 2.83           | 0.0349         | 25              | 8              | 48              | 81             |
| <b>S3</b>  | 0.74            | 0.21           | 0.99            | 1.94           | 0.0544         | 14              | 4              | 18              | 36             |
| <b>S4</b>  | 1.58            | 0.92           | 10.68           | 13.19          | 0.0207         | 76              | 45             | 515             | 636            |
| <b>S5</b>  | 1.27            | 0.57           | 4.49            | 6.33           | 0.0603         | 21              | 9              | 75              | 105            |
| <b>S6</b>  | 1.38            | 0.54           | 5.74            | 7.65           | 0.0348         | 40              | 15             | 165             | 220            |
| <b>S7</b>  | 1.72            | 0.91           | 6.44            | 9.07           | 0.0226         | 76              | 40             | 285             | 401            |
| <b>S8</b>  | 1.79            | 1.07           | 15.02           | 17.88          | 0.0486         | 37              | 22             | 309             | 368            |
| <b>S9</b>  | 2.29            | 1.72           | 15.10           | 19.12          | 0.0506         | 45              | 34             | 299             | 378            |
| <b>S10</b> | 1.25            | 0.81           | 5.31            | 7.37           | 0.0232         | 54              | 35             | 228             | 317            |
| <b>S11</b> | 3.00            | 2.18           | 22.12           | 27.31          | 0.0596         | 50              | 37             | 371             | 458            |
| <b>S12</b> | 3.21            | 2.41           | 14.44           | 20.05          | 0.0386         | 83              | 62             | 374             | 519            |
| <b>S13</b> | 1.53            | 0.74           | 3.00            | 5.27           | 0.0299         | 51              | 25             | 100             | 176            |
| <b>S14</b> | 1.12            | 0.46           | 1.93            | 3.51           | 0.0295         | 38              | 15             | 65              | 119            |
| <b>S15</b> | 0.72            | 0.31           | 1.16            | 2.19           | 0.0131         | 55              | 23             | 88              | 167            |
| <b>S16</b> | 0.37            | 0.14           | 0.44            | 0.96           | 0.0118         | 32              | 12             | 37              | 81             |
| <b>S17</b> | 0.36            | 0.11           | 0.35            | 0.82           | 0.0122         | 30              | 9              | 29              | 67             |
| <b>S18</b> | 0.54            | 0.29           | 1.24            | 2.06           | 0.0050         | 106             | 57             | 245             | 408            |

|            |      |      |       |       |        |     |    |     |      |
|------------|------|------|-------|-------|--------|-----|----|-----|------|
| <b>S19</b> | 1.01 | 0.40 | 1.95  | 3.36  | 0.0199 | 51  | 20 | 98  | 169  |
| <b>S20</b> | 2.93 | 1.95 | 11.40 | 16.29 | 0.0326 | 90  | 60 | 349 | 499  |
| <b>S21</b> | 1.89 | 0.94 | 6.61  | 9.44  | 0.0230 | 82  | 41 | 288 | 411  |
| <b>S22</b> | 6.26 | 3.52 | 29.36 | 39.14 | 0.0389 | 161 | 91 | 755 | 1006 |
| <b>S23</b> | 5.91 | 2.41 | 13.57 | 21.88 | 0.0431 | 137 | 56 | 315 | 508  |
| <b>S24</b> | 2.05 | 1.19 | 5.29  | 8.53  | 0.0304 | 67  | 39 | 174 | 281  |
| <b>S25</b> | 1.55 | 0.59 | 5.25  | 7.39  | 0.0326 | 48  | 18 | 161 | 227  |
| <b>S26</b> | 3.42 | 2.16 | 12.43 | 18.02 | 0.0394 | 87  | 55 | 315 | 457  |
| <b>S27</b> | 1.50 | 0.54 | 2.12  | 4.16  | 0.0235 | 64  | 23 | 90  | 177  |
| <b>S28</b> | 0.62 | 0.20 | 0.59  | 1.4   | 0.0363 | 17  | 5  | 16  | 39   |
| <b>S29</b> | 0.31 | 0.08 | 0.29  | 0.68  | 0.0235 | 13  | 3  | 12  | 29   |
| <b>S30</b> | 0.38 | 0.15 | 0.40  | 0.93  | 0.0303 | 13  | 5  | 13  | 31   |
| <b>S31</b> | 0.27 | 0.12 | 0.30  | 0.68  | 0.0261 | 10  | 4  | 11  | 26   |
| <b>S32</b> | 0.57 | 0.13 | 0.51  | 1.22  | 0.0319 | 18  | 4  | 16  | 38   |
| <b>S33</b> | 1.05 | 0.33 | 1.18  | 2.57  | 0.0309 | 34  | 11 | 38  | 83   |
| <b>S34</b> | 4.86 | 2.21 | 7.65  | 14.72 | 0.0398 | 122 | 55 | 192 | 369  |
| <b>S35</b> | 2.03 | 0.92 | 6.28  | 9.24  | 0.0378 | 54  | 24 | 166 | 245  |
| <b>S36</b> | 1.44 | 0.72 | 2.98  | 5.14  | 0.0416 | 35  | 17 | 72  | 124  |
| <b>S37</b> | 0.94 | 0.47 | 1.36  | 2.77  | 0.0363 | 26  | 13 | 37  | 76   |
| <b>S38</b> | 5.21 | 2.32 | 21.42 | 28.95 | 0.0415 | 126 | 56 | 517 | 698  |
| <b>S39</b> | 1.26 | 0.59 | 2.35  | 4.19  | 0.0295 | 43  | 20 | 79  | 142  |
| <b>S40</b> | 2.68 | 1.18 | 6.86  | 10.72 | 0.0304 | 88  | 39 | 225 | 352  |

*Figure SI-1 Average HBCDD isomer profile in (a) tidal proportion and (b) non-tidal proportion of the river Medway (bar whiskers represent 1 standard deviation)*

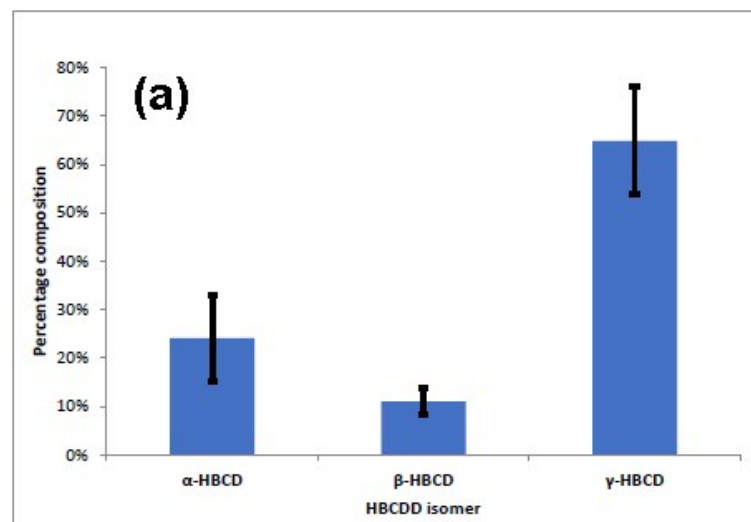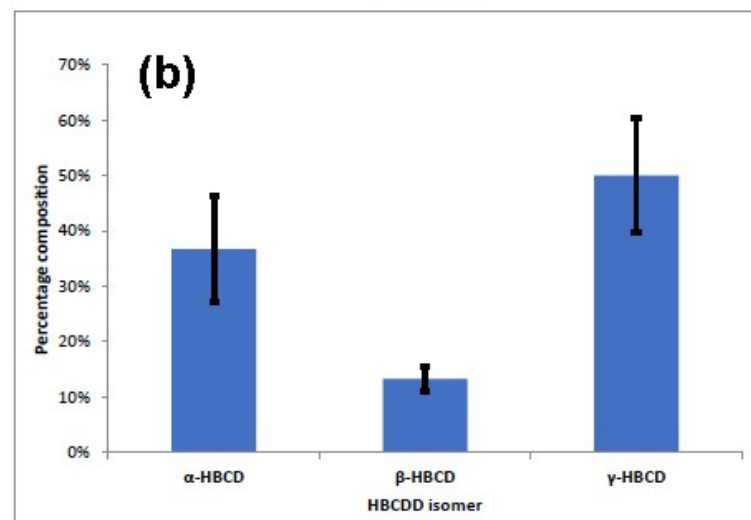

## SI.2 Extended Method

As mentioned in the main text the samples were analysed according to the method reported by (Ganci et al, 2019). Details are provided below.

### Chemical standards

Chemicals used in the analysis of the samples collected were all procured from Fisher Scientific, Loughborough, UK. These were of at least HPLC standard grade. High purity native,  $^{13}\text{C}$ - and  $\text{d}_{18}$ - isotope labelled  $\alpha$ -, $\beta$ -, and  $\gamma$ -HBCDDs standards were purchased from Wellington Laboratories Inc. (Guelph, Canada). Florisil HyperSep™ SPE cartridges (1 g, 60 cm<sup>3</sup>), concentrated sulphuric acid, copper powder and anhydrous sodium sulphate were also obtained from Fisher Scientific, Loughborough, UK.

### **Measurement of total organic carbon (TOC):**

TOC was measured using the Loss on Ignition (LOI) method (Santisteban, 2004). Briefly, clean crucibles were dried in the oven at 105°C overnight, cooled in dessicator for 30min and their weight was recorded. Freeze-dried samples were added to crucibles and dried in the oven at 60°C overnight, cooled in dessicator and weight of crucibles with samples was recorded. Subsequently, crucibles with samples were placed in the furnace at 550°C and left for 6 hours. Finally, weight of cooled crucibles with ash was recorded. %TOC was calculated as:

$$\%TOC = \frac{\text{pre ignition weight (g)} - \text{post ignition weight (g)}}{\text{pre ignition weight (g)}} \times 100$$

### **Sample extraction and clean up**

2g of each sample were weighed into a clean glass extraction tube and mixed with 20 $\mu$ L of international standard mixture, as well as 2g of copper powder to remove sulphur. The samples were extracted using 4 mL of hexane:acetone (3:1 v/v) which were then vortexed for 5 minutes before ultrasonication for 20 minutes and were then put in a centrifuge for 5 minutes at 4,000 rotations per minute. The solvent layer was transferred to a clean dry test tube and the process was repeated twice for each sample. Under a gentle N<sub>2</sub> stream, the combined solvent extract was evaporated to incipient dryness and reconstituted using 2ml of hexane.

Sulphuric acid (3 ml) was used to wash the extract. The organic phase was allowed to separate and transferred to another clean dry test tube. The

acid layer was washed with 2mL of hexane twice and the combined washings were again subject to a gentle stream of N<sub>2</sub>, until reduced to ~1mL. The sample was then loaded onto a conditioned HyperSep™1 g Florisil SPE cartridge onto which 1g of sodium sulphate was added. 20ml of Hexane:dichloromethane (1:1 v/v) was then used for elution of target compounds. The clean extract was concentrated under N<sub>2</sub> and reconstituted using methanol:toluene (1:1 v/v) containing 250 pg/μl d<sub>18</sub>- α-,β-, and γ-HBCDDs used as recovery determination (syringe) standards for QA/QC purposes.

### Instrumental Analysis

2 μL of each sample were analysed using a UPLC-Orbitrap-HRMS instrument. This comprised an UltiMate® 3000 ultra performance liquid chromatography system with a HPG-3400RS dual pump, TCC-3000 column oven, WPS-3000 auto sampler and a Q-Exactive™Plus Orbitrap mass spectrometer. Chromatographic separation was carried out on an Accucore™RP-MS column (100 × 2.1 mm, 2.6 μm) with mobile phases consisting of water (A) and methanol (B) at 400 μl min<sup>-1</sup> using a dedicated gradient elution programme.

| Time [min.] | % A (Water) | % B (Methanol) | Flow rate [μL min <sup>-1</sup> ] |
|-------------|-------------|----------------|-----------------------------------|
| 0           | 35          | 65             | 400                               |
| 3           | 35          | 65             | 400                               |
| 4           | 15          | 85             | 400                               |
| 6           | 15          | 85             | 400                               |
| 7           | 0           | 100            | 500                               |
| 10          | 0           | 100            | 500                               |
| 11          | 15          | 85             | 400                               |
| 13          | 15          | 85             | 400                               |
| 14          | 35          | 65             | 400                               |
| 17          | 35          | 65             | 400                               |

HBCDD was then determined in the negative atmospheric pressure chemical ionisation mode [(-) APCI]. The Orbitrap was set to the following

settings : 70,000 FWHM (full width at half maximum at 200 m/z and scan rate of 3 Hz at 200m/z), AGC target  $1e^6$ , maximum injection time 100 ms, scan range 250 to 1000m/z, profile spectrum data type, sheath gas (nitrogen) flow rate 25 AU (arbitrary units), aux gas (nitrogen) flow rate 5 AU, discharge current  $30\mu\text{A}$ , capillary temperature  $250\text{ }^\circ\text{C}$ , S-lens RF level 50 AU and aux gas heater temperature  $320\text{ }^\circ\text{C}$ .

Identification was carried out using the analyte accurate mass and quantification was conducted using Xcalibur™ software.

### QA/QC

Method linearity was established using 5-point calibration curve for each target analyte over a concentration range of 20-1000  $\text{pg}/\mu\text{l}$  (Table SI-2). The standard reference material SRM1944 (NIST) for sediment was used to evaluate the accuracy of the method for HBCDDs. One SRM sample was analysed for every 15 sediment samples. Results obtained for the SRM 1944 ( $19.6 \pm 1.5\text{ ng/g dw}$ ) were generally in good accordance with the certified levels ( $21.2 \pm 0.9\text{ ng/g dw}$ ). In addition, triplicate analysis of 5 samples revealed low RSD (6-9%) indicating good precision. Recoveries for internal standards were in the range of 90 to 120% for all samples, Limits of detection (LOD) and limits of quantification (LOQ) were estimated based on method described by Taylor (1984). In brief, standards were analysed in replicates ( $n = 10$ ). The standard deviation of each measured concentration was plotted versus the specified concentration, giving a y-axis intercept of the resulting regression line corresponds to  $s_0$ . The LOD is then defined as  $3 \times s_0$ , while the LOQ is defined as  $10 \times s_0$ .

To minimise blank contamination, all glassware was cleaned by soaking in a detergent solution overnight, before rinsing with deionised water. This was followed by washing with acetone, hexane, toluene and dichloromethane and subsequent baking at  $120\text{ }^\circ\text{C}$  overnight. One method blank (sodium sulfate instead of sediment) was analysed with every set of 6 samples. In addition, 6 field blanks were collected alongside sediment samples from sites 1, 6, 14, 18, 29, 34. Each field blank constitutes  $\sim 2\text{ gm}$  of anhydrous sodium sulfate that were placed in a polyethylene sealable bag at the sampling site and then underwent all steps of sample transport, storage and processed as a sample. None of the target HBCDDs were detected in the blanks.

### Table SI-2: QA/QC parameters



| Compound | LOD pg/g | LOQ pg/g | Linearity | Range (pg/μl) | IS used                  | Recovery (%) (SD) |
|----------|----------|----------|-----------|---------------|--------------------------|-------------------|
| α-HBCDD  | 0.1      | 0.4      | 0.9913    | 20-1000       | <sup>13</sup> C- α-HBCDD | 102 (13)          |
| β-HBCDD  | 0.15     | 0.5      | 0.9964    | 20-1000       | <sup>13</sup> C-β-HBCDD  | 109 (8)           |
| γ-HBCDD  | 0.1      | 0.4      | 0.9987    | 20-1000       | <sup>13</sup> C-γ-HBCDD  | 105 (12)          |

### *Determination of Internal (surrogate) Standard Recoveries*

It is important to calculate the recoveries of internal standards (IS) as a QA/QC measure. The recoveries of IS (added before extraction) are calculated based on the recovery determination (syringe) standard (RDS), which is added in the final sample solvent for LC injection.

Internal standard (IS) recoveries are calculated as follows:

$$\% \text{ IS Recovery} = \left[ \left( \frac{A_{IS}}{A_{RDS}} \right)_S \times \left( \frac{A_{RDS}}{A_{IS}} \right)_{STD} \times \left( \frac{C_{IS}}{C_{RDS}} \right)_{STD} \times \left( \frac{C_{RDS}}{C_{IS}} \right)_S \right] \times 100$$

where  $(A_{IS}/A_{RDS})_S$  = ratio of internal standard peak area to recovery determination standard peak area in the sample;  $(A_{RDS}/A_{IS})_{STD}$  = ratio of recovery determination standard peak area to internal standard peak area in the calibration standard (the average of values obtained for both calibration standards run for a batch of samples is used);  $(C_{IS}/C_{RDS})_{STD}$  = ratio of concentration of internal standard to concentration of recovery

determination standard in the calibration standard; and  $(C_{RDS}/C_{IS})_S$  = ratio of concentration of recovery determination standard to concentration of internal standard in the sample.

## References

Ganci, A. P., Vane, C. H., Abdallah, M. A.-E., Moehring, M., Harrad, S. (2019). Legacy PBDEs and NBFRs in sediments of the tidal River Thames using liquid chromatography coupled to a high resolution accurate mass Orbitrap mass spectrometer. *Science of the Total Environment*. 658, 1355-1366.

Santisteban, J.I., Mediavilla, R., López-Pamo, E., C.J. Dabrio, M.B.R. Zapata, M.J.G. García, S. Castaño, and P.E. Martínez-Alfaro (2004). Loss on ignition: a qualitative or quantitative method for organic matter and carbonate mineral content in sediments? *Journal of Paleolimnology* 32: 287-299.
